# Supplementary material for: DNA Methylation mediated down-regulating of MicroRNA-33b and its role in gastric cancer
Source: PubMed Central journal article supplement (PMC4700416; doi:10.1038/srep18824), 2016-01-05
Supplement: srep18824-s1.pdf [file srep18824-s1.pdf]

# **DNA Methylation mediated down-regulating of MicroRNA-33b and its role in gastric cancer**

Haixin Yin<sup>1, 2, 6</sup>, Peng Song<sup>3, 6</sup>, Rui Su<sup>1, 6</sup>, Guihua Yang<sup>4, 6</sup>, Lei Dong<sup>1</sup>, Min Luo<sup>1</sup>, Bin Wang<sup>1, 2</sup>, Bei Gong<sup>4</sup>, Changzheng Liu<sup>1</sup>, Wei Song<sup>1</sup>, Fang Wang<sup>1</sup>, Yanni Ma<sup>1</sup>, Junwu Zhang<sup>1</sup>, Weibin Wang<sup>5\*</sup>, Jia Yu<sup>1\*</sup>

<sup>1</sup>Department of Biochemistry, Institute of Basic Medical Sciences, Chinese Academy of Medical Sciences (CAMS) & Peking Union Medical College (PUMC), Beijing 100005, PR China

<sup>2</sup>Department of Surgery, The Shanxi Academy of Medical Sciences & Shanxi Dayi Hospital, Taiyuan 030032, PR China

<sup>3</sup>The First Surgery Department of Nanlou, Chinese People's Liberation Army General Hospital, Beijing 100853, PR China

<sup>4</sup>Department of Clinical Laboratory, Beijing Shijitan Hospital, Beijing100038, PR China

<sup>5</sup>Department of General Surgery, Peking Union Medical College Hospital, CAMS & PUMC, Beijing 100005, PR China

<sup>6</sup>These authors contributed equally to this work.

\* To whom correspondence should be addressed. E-mail: j-yu@ibms.pumc.edu.cn, Fax: 86-10-65240529, Tel: 86-10-69156423; ww\_b\_xh@yahoo.com.cn; Tel: 86-10-69156007; Fax: 86-10-69156007

Supplementary Figures:

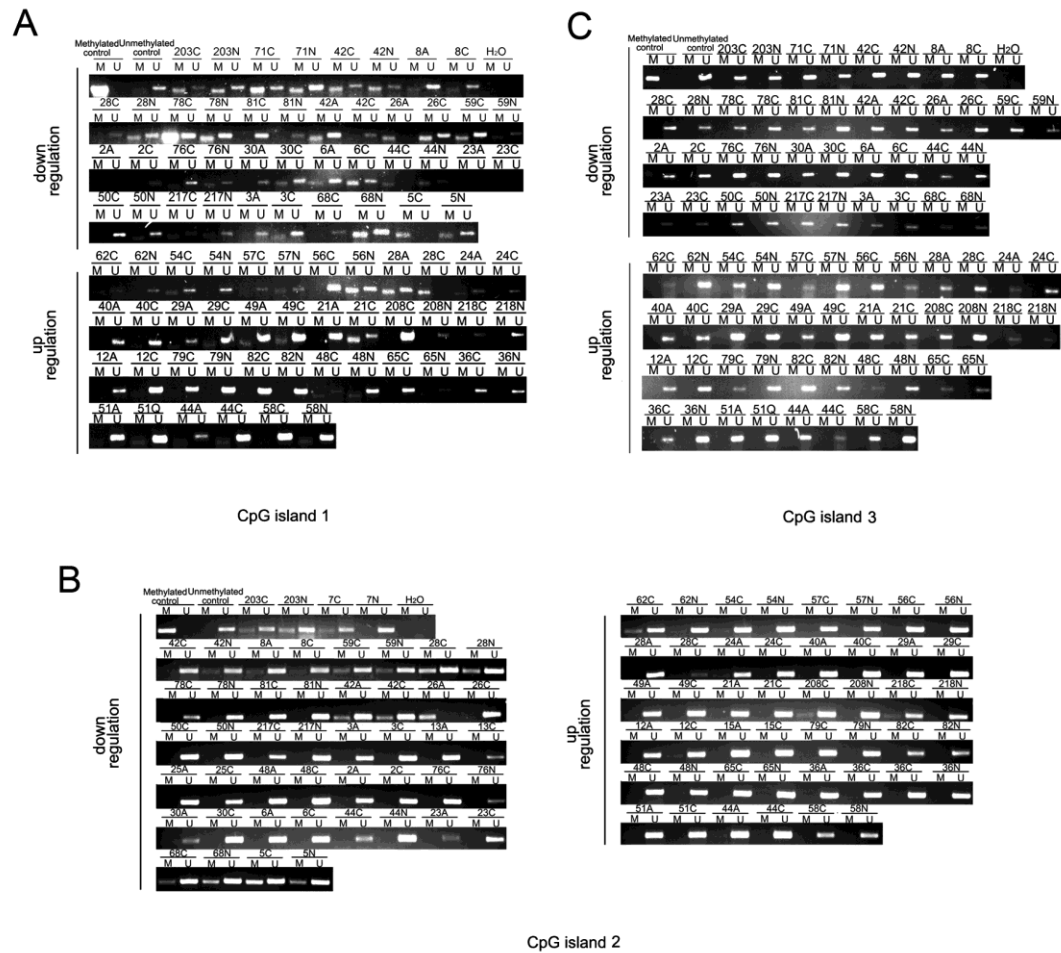

Supplementary Figure 1. Agarose gel electrophoresis of MSP analysis of miR-33b CpG islands in GC tissues. M, methylated state; U, unmethylated state; Methylated control, Methyltransferase treated normal lymphocytes DNA; Unmethyl control, normal lymphocytes DNA.

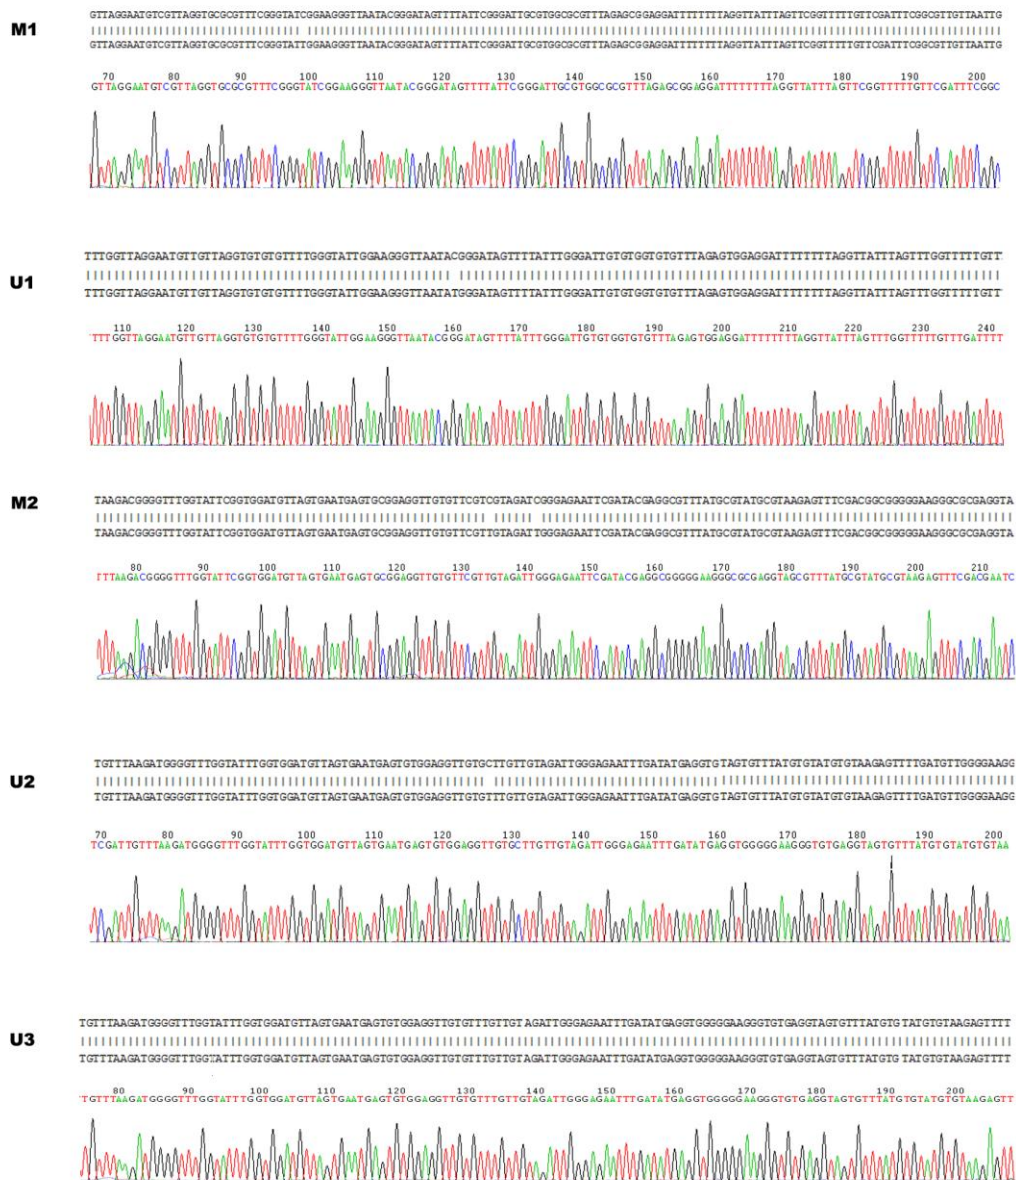

Supplementary Figure 2. The sequencing data of CpG island 1/2/3 in one GC sample.

**Table S1. The primers used in the article.**

|                      | <b>primer</b>       | <b>sequence (5'-3')</b>      |
|----------------------|---------------------|------------------------------|
|                      |                     | GTCGTATCCAGTGCAGGGTCCGAGGT   |
| <b>Real-time PCR</b> | miR-33b RT          | ATTCGCACTGGATACGACTGCAATGC   |
|                      | miR-33b forward     | GCGTGCATTGCTGTTGCAT          |
|                      | miR-33b reverse     | GTGCAGGGTCCGAGGT             |
|                      | miR-33bTaqMan probe | FAM-CTGGATACGACTGCAATGC-MGB  |
|                      | U6 RT               | AAAATATGGAACGCTTCACGAATTTG   |
|                      | U6 forward          | CTCGCTTCGGCAGCACATACT        |
|                      | U6 reverse          | ACGCTTCACGAATTTGCGTGTG       |
|                      | U6 probe            | FAM-CCATGCTAATCTTCTCTGTA-MGB |
|                      | SREBF-1 forward     | TTGCCGACCCTGGTGAGT           |
|                      | SREBF-1 reverse     | AATGGCGTTGTGGGCTGT           |
| <b>MSP</b>           | M1 forward:         | GTTAGGAATGTCGTTAGGTGC        |
|                      | M1 reverse:         | CAATTAACAACGCCGAAAT          |
|                      | U1 forward:         | TTGGTTAGGAATGTTGTTAGGTGT     |
|                      | U1 reverse:         | TCCAATTAACAACACCAAAT         |
|                      | M2 forward:         | TAAGACGGGGTTTGGTATTC         |
|                      | M2 reverse:         | CGTCGAAACTCTTACGCATA         |
|                      | U2 forward:         | GTTTAAGATGGGGTTTGGTATTT      |
|                      | U2 reverse:         | AACATCAAACCTTACACATAC        |
|                      | M3 forward:         | TTGTCGTTTCGTTAGGGTTC         |
|                      | M3 reverse:         | TTAAAACGAACGTCGGCTA          |
| <b>QMSP</b>          | U3 forward:         | GTTGTTGTTTTGTTAGGGTTT        |
|                      | U3 reverse:         | ATTAAAACAAACATCCACTA         |
|                      | M1 forward:         | GTTAGGAATGTCGTTAGGTGC        |
|                      | M1 reverse:         | CAATTAACAACGCCGAAAT          |
|                      | U1 forward:         | TTGGTTAGGAATGTTGTTAGGTGT     |
|                      | U1 reverse:         | TCCAATTAACAACACCAAAT         |
|                      | GAPDH forward:      | CGCTTTCTTTCTTTTCGC           |
|                      | GAPDH reverse:      | TGCCATTTCATTTCTTCC           |

**Table S2. Association analysis between the expression of miR-33b with clinicopathological features in patients with GC.**

|                        | N   | mean   | SD    | pValue  |
|------------------------|-----|--------|-------|---------|
| <b>Gender</b>          |     |        |       |         |
| Male                   | 121 | -0.692 | 4.675 |         |
| Female                 | 29  | 1.020  | 3.278 | 0.190   |
| <b>Age</b>             |     |        |       |         |
| >= 60                  | 77  | -0.568 | 3.812 |         |
| < 60                   | 73  | 0.332  | 5.328 | 0.227   |
| <b>Venous invasion</b> |     |        |       |         |
| Negative               | 70  | -0.389 | 4.156 |         |
| Positive               | 54  | -0.223 | 4.145 | 0.936   |
| <b>Position</b>        |     |        |       |         |
| Cardia                 | 41  | -0.409 | 4.378 |         |
| Gastric body           | 45  | -0.021 | 4.823 |         |
| Gastric antrum         | 39  | -0.612 | 4.411 | 0.904   |
| <b>Borrmann typing</b> |     |        |       |         |
| I                      | 98  | -0.354 | 4.323 |         |
| II                     | 8   | -1.433 | 4.418 |         |
| III+IV                 | 7   | -0.213 | 4.456 | 0.834   |
| <b>pT stage</b>        |     |        |       |         |
| T1+T2                  | 24  | -0.122 | 5.919 |         |
| T3+T4                  | 113 | -0.362 | 4.187 | 0.845   |
| <b>pN stage</b>        |     |        |       |         |
| N0+N1                  | 95  | 0.038  | 4.023 |         |
| N2+N3                  | 33  | -0.154 | 5.321 | 0.877   |
| <b>pM stage</b>        |     |        |       |         |
| M0                     | 123 | 0.018  | 4.423 |         |
| M1                     | 14  | -3.189 | 4.763 | 0.035*  |
| <b>pTNM stage</b>      |     |        |       |         |
| I                      | 27  | 1.235  | 4.351 |         |
| II                     | 35  | 1.014  | 3.340 |         |
| III                    | 64  | 0.035  | 3.157 |         |
| IV                     | 24  | -3.351 | 3.223 | 0.008** |

\* p<0.05 \*\* p<0.01

| A  | B                                                       | C             | D                  | E                 | F                    | G                              | H                     | I                           | J                   | K                      |
|----|---------------------------------------------------------|---------------|--------------------|-------------------|----------------------|--------------------------------|-----------------------|-----------------------------|---------------------|------------------------|
| 1  | <b>Table S3. Raw data of qMSP analysis in GC tissue</b> |               |                    |                   |                      |                                |                       |                             |                     |                        |
| 2  | Data Set                                                | Target        | Sample             | Relative Quantity | Relative Quantity SD | Corrected Relative Quantity SD | Relative Quantity SEM | Corrected Relative Quantity | Unscaled Expression | Unscaled Expression SD |
| 3  | 1-SYBR                                                  | methylation   | Methylation contro | 0.21601           | 0.02921              | 0.02921                        | 0.02065               | 0.02065                     | 16.63273            | 2.24876                |
| 4  | 1-SYBR                                                  | unmethylation | Methylation contro | 0.00190           | 0.00044              | 0.00044                        | 0.00025               | 0.00025                     | 0.00066             | 0.00095                |
| 5  | 1-SYBR                                                  | methylation   | 803                | 1.00000           | 0.01649              | 0.01649                        | 0.01166               | 0.01166                     | 1.92858             | 0.22276                |
| 6  | 1-SYBR                                                  | unmethylation | 803                | 1.00000           | 0.31052              | 0.31052                        | 0.17928               | 0.17928                     | 1.00000             | 0.33387                |
| 7  | 1-SYBR                                                  | methylation   | 803 AZA            | 0.00194           | 0.00106              | 0.00106                        | 0.00061               | 0.00061                     | 0.00263             | 0.00211                |
| 8  | 1-SYBR                                                  | unmethylation | 803 AZA            | 0.00190           | 0.00044              | 0.00044                        | 0.00025               | 0.00025                     | 0.00366             | 0.00095                |
| 9  | 1-SYBR                                                  | methylation   | 27                 | 0.31118           | 0.09645              | 0.09645                        | 0.06820               | 0.06820                     | 18.76637            | 5.81640                |
| 10 | 1-SYBR                                                  | unmethylation | 27                 | 0.00033           | 0.00000              | 0.00000                        | 0.00000               | 0.00000                     | 0.32044             | 0.00000                |
| 11 | 1-SYBR                                                  | methylation   | 27 AZA             | 0.50127           | 0.05458              | 0.05458                        | 0.03151               | 0.03151                     | 1.10673             | 0.87671                |
| 12 | 1-SYBR                                                  | unmethylation | 27 AZA             | 0.00194           | 0.00106              | 0.00106                        | 0.00061               | 0.00061                     | 0.00263             | 0.00211                |
| 13 | 1-SYBR                                                  | methylation   | 203C               | 0.01515           | 0.02473              | 0.02473                        | 0.01428               | 0.01428                     | 0.12595             | 0.20564                |
| 14 | 1-SYBR                                                  | methylation   | 203N               | 0.00033           | 0.00000              | 0.00000                        | 0.00000               | 0.00000                     | 0.32044             | 0.00000                |
| 15 | 1-SYBR                                                  | methylation   | 42C                | 0.05854           | 0.03096              | 0.03096                        | 0.01787               | 0.01787                     | 0.05854             | 0.03178                |
| 16 | 1-SYBR                                                  | methylation   | 42N                | 0.12166           | 0.09184              | 0.09184                        | 0.05303               | 0.05303                     | 0.26861             | 0.29247                |
| 17 | 1-SYBR                                                  | methylation   | 71C                | 0.21601           | 0.02921              | 0.02921                        | 0.02065               | 0.02065                     | 16.63273            | 2.24876                |
| 18 | 1-SYBR                                                  | methylation   | 71N                | 0.10121           | 0.09303              | 0.09303                        | 0.05371               | 0.05371                     | 0.15125             | 0.16713                |
| 19 | 1-SYBR                                                  | unmethylation | 203C               | 0.27136           | 0.06854              | 0.06854                        | 0.03957               | 0.03957                     | 2.25608             | 0.56982                |
| 20 | 1-SYBR                                                  | unmethylation | 203N               | 0.00027           | 0.00040              | 0.00040                        | 0.00023               | 0.00023                     | 0.26372             | 0.39471                |
| 21 | 1-SYBR                                                  | unmethylation | 42C                | 1.00000           | 0.31052              | 0.31052                        | 0.17928               | 0.17928                     | 1.00000             | 0.33387                |
| 22 | 1-SYBR                                                  | unmethylation | 42N                | 0.50127           | 0.05458              | 0.05458                        | 0.03151               | 0.03151                     | 1.10673             | 0.87671                |
| 23 | 1-SYBR                                                  | unmethylation | 71C                | 0.13184           | 0.00982              | 0.00982                        | 0.00567               | 0.00567                     | 10.15168            | 0.75643                |
| 24 | 1-SYBR                                                  | unmethylation | 71N                | 0.58206           | 0.18858              | 0.18858                        | 0.10888               | 0.10888                     | 0.86984             | 0.60324                |
| 25 | 1-SYBR                                                  | methylation   | 208C               | 0.64768           | 0.03408              | 0.03408                        | 0.02410               | 0.02410                     | 7.50335             | 0.39486                |
| 26 | 1-SYBR                                                  | methylation   | 208N               | 0.31847           | 0.03444              | 0.03444                        | 0.02435               | 0.02435                     | 6.95616             | 1.67017                |
| 27 | 1-SYBR                                                  | methylation   | 218C               | 0.69737           | 0.06995              | 0.06995                        | 0.04038               | 0.04038                     | 9.98282             | 1.50565                |
| 28 | 1-SYBR                                                  | methylation   | 218N               | 0.70281           | 0.27787              | 0.27787                        | 0.19648               | 0.19648                     | 5.11976             | 2.02421                |
| 29 | 1-SYBR                                                  | methylation   | 21A                | 0.04047           | 0.01234              | 0.01234                        | 0.00873               | 0.00873                     | 0.57670             | 0.22023                |
| 30 | 1-SYBR                                                  | methylation   | 21C                | 0.41884           | 0.00000              | 0.00000                        | 0.00000               | 0.00000                     | 10.91621            | 3.12917                |
| 31 | 1-SYBR                                                  | methylation   | 48C                | 0.74579           | 0.02965              | 0.02965                        | 0.02096               | 0.02096                     | 0.74579             | 0.13554                |
| 32 | 1-SYBR                                                  | methylation   | 48N                | 0.37413           | 0.11039              | 0.11039                        | 0.07805               | 0.07805                     | 4.85193             | 1.47638                |
| 33 | 1-SYBR                                                  | methylation   | 71C                | 0.02466           | 0.00974              | 0.00974                        | 0.00689               | 0.00689                     | 1.56886             | 0.61945                |
| 34 | 1-SYBR                                                  | methylation   | 82C                | 1.00000           | 0.10629              | 0.10629                        | 0.06137               | 0.06137                     | 1.56857             | 0.34870                |
| 35 | 1-SYBR                                                  | methylation   | 82N                | 0.30739           | 0.02044              | 0.02044                        | 0.01445               | 0.01445                     | 1.48191             | 0.71723                |
| 36 | 1-SYBR                                                  | unmethylation | 208C               | 0.44917           | 0.03543              | 0.03543                        | 0.02045               | 0.02045                     | 5.20359             | 0.41041                |
| 37 | 1-SYBR                                                  | unmethylation | 208N               | 0.73485           | 0.02894              | 0.02894                        | 0.02046               | 0.02046                     | 16.05092            | 3.49833                |
| 38 | 1-SYBR                                                  | unmethylation | 218C               | 0.41204           | 0.06083              | 0.06083                        | 0.04302               | 0.04302                     | 5.89834             | 1.09532                |
| 39 | 1-SYBR                                                  | unmethylation | 218N               | 1.00000           | 0.09435              | 0.09435                        | 0.06671               | 0.06671                     | 7.28475             | 0.68733                |
| 40 | 1-SYBR                                                  | unmethylation | 21A                | 0.38754           | 0.04237              | 0.04237                        | 0.02446               | 0.02446                     | 5.52259             | 1.40537                |
| 41 | 1-SYBR                                                  | unmethylation | 21C                | 0.12134           | 0.00419              | 0.00419                        | 0.00242               | 0.00242                     | 3.16258             | 0.91311                |
| 42 | 1-SYBR                                                  | unmethylation | 48C                | 0.22735           | 0.00495              | 0.00495                        | 0.00286               | 0.00286                     | 0.22735             | 0.04062                |
| 43 | 1-SYBR                                                  | unmethylation | 48N                | 0.95623           | 0.06372              | 0.06372                        | 0.03679               | 0.03679                     | 12.40111            | 1.23866                |
| 44 | 1-SYBR                                                  | unmethylation | 82C                | 0.96043           | 0.05214              | 0.05214                        | 0.03010               | 0.03010                     | 1.50650             | 0.30529                |
| 45 | 1-SYBR                                                  | unmethylation | 82N                | 0.42932           | 0.04053              | 0.04053                        | 0.02340               | 0.02340                     | 2.06969             | 1.01127                |
| 46 | 1-SYBR                                                  | methylation   | 28C                | 0.84807           | 0.26072              | 0.26072                        | 0.18436               | 0.18436                     | 4.05795             | 1.24754                |
| 47 | 1-SYBR                                                  | methylation   | 28N                | 0.68776           | 0.00338              | 0.00338                        | 0.00239               | 0.00239                     | 0.80117             | 0.48569                |
| 48 | 1-SYBR                                                  | methylation   | 49A                | 0.92656           | 0.02820              | 0.02820                        | 0.01994               | 0.01994                     | 4.60939             | 0.14030                |
| 49 | 1-SYBR                                                  | methylation   | 49C                | 0.80226           | 0.15761              | 0.15761                        | 0.09099               | 0.09099                     | 1.08001             | 0.28553                |
| 50 | 1-SYBR                                                  | methylation   | 71C                | 1.00000           | 0.00000              | 0.00000                        | 0.00000               | 0.00000                     | 2.15548             | 0.00000                |
| 51 | 1-SYBR                                                  | methylation   | 78C                | 0.29155           | 0.00000              | 0.00000                        | 0.00000               | 0.00000                     | 1.28139             | 0.54842                |
| 52 | 1-SYBR                                                  | methylation   | 78N                | 0.90556           | 0.45944              | 0.45944                        | 0.26526               | 0.26526                     | 0.90556             | 0.68760                |

| A   | B      | C             | D   | E       | F       | G       | H       | I       | J        | K       |
|-----|--------|---------------|-----|---------|---------|---------|---------|---------|----------|---------|
| 53  | 1-SYBR | methylation   | 8A  | 0.27287 | 0.02587 | 0.02587 | 0.01829 | 0.01829 | 19.83919 | 1.88088 |
| 54  | 1-SYBR | methylation   | 8C  | 0.77015 | 0.07037 | 0.07037 | 0.04063 | 0.04063 | 3.26932  | 0.29871 |
| 55  | 1-SYBR | unmethylation | 28C | 0.01027 | 0.00044 | 0.00044 | 0.00025 | 0.00025 | 0.04916  | 0.00209 |
| 56  | 1-SYBR | unmethylation | 28N | 0.00052 | 0.00187 | 0.00187 | 0.00108 | 0.00108 | 0.00061  | 0.00222 |
| 57  | 1-SYBR | unmethylation | 49A | 0.34288 | 0.04807 | 0.04807 | 0.02775 | 0.02775 | 1.70571  | 0.23912 |
| 58  | 1-SYBR | unmethylation | 49C | 0.49224 | 0.05994 | 0.05994 | 0.03461 | 0.03461 | 0.66266  | 0.14233 |
| 59  | 1-SYBR | unmethylation | 78C | 0.00486 | 0.00087 | 0.00087 | 0.00050 | 0.00050 | 0.02137  | 0.00992 |
| 60  | 1-SYBR | unmethylation | 78N | 1.00000 | 0.07356 | 0.07356 | 0.04247 | 0.04247 | 1.00000  | 0.56970 |
| 61  | 1-SYBR | unmethylation | 8A  | 0.00545 | 0.00124 | 0.00124 | 0.00072 | 0.00072 | 0.39606  | 0.09040 |
| 62  | 1-SYBR | unmethylation | 8C  | 0.00572 | 0.00333 | 0.00333 | 0.00192 | 0.00192 | 0.02430  | 0.01412 |
| 63  | 1-SYBR | methylation   | 26A | 0.33013 | 0.04947 | 0.04947 | 0.02856 | 0.02856 | 4.29496  | 0.70558 |
| 64  | 1-SYBR | methylation   | 26C | 0.61525 | 0.03815 | 0.03815 | 0.02697 | 0.02697 | 7.13873  | 0.44262 |
| 65  | 1-SYBR | methylation   | 54C | 0.72495 | 0.14985 | 0.14985 | 0.08652 | 0.08652 | 1.39823  | 0.75513 |
| 66  | 1-SYBR | methylation   | 54N | 0.66909 | 0.19711 | 0.19711 | 0.11380 | 0.11380 | 0.66909  | 0.28684 |
| 67  | 1-SYBR | methylation   | 57C | 0.75624 | 0.21597 | 0.21597 | 0.12469 | 0.12469 | 6.60664  | 2.54497 |
| 68  | 1-SYBR | methylation   | 57N | 0.41145 | 0.20332 | 0.20332 | 0.11739 | 0.11739 | 1.17717  | 0.62412 |
| 69  | 1-SYBR | methylation   | 59C | 0.47556 | 0.09097 | 0.09097 | 0.05252 | 0.05252 | 7.45356  | 1.42574 |
| 70  | 1-SYBR | methylation   | 59N | 0.29253 | 0.00884 | 0.00884 | 0.00625 | 0.00625 | 5.74414  | 1.30451 |
| 71  | 1-SYBR | methylation   | 62C | 0.09485 | 0.04754 | 0.04754 | 0.02745 | 0.02745 | 1.11506  | 0.67898 |
| 72  | 1-SYBR | methylation   | 62N | 0.06075 | 0.00229 | 0.00229 | 0.00162 | 0.00162 | 0.91784  | 0.23570 |
| 73  | 1-SYBR | methylation   | 71C | 1.00000 | 0.00000 | 0.00000 | 0.00000 | 0.00000 | 6.34316  | 0.00000 |
| 74  | 1-SYBR | unmethylation | 26A | 0.01399 | 0.00212 | 0.00212 | 0.00123 | 0.00123 | 0.18201  | 0.03024 |
| 75  | 1-SYBR | unmethylation | 26C | 0.01049 | 0.00294 | 0.00294 | 0.00170 | 0.00170 | 0.12174  | 0.03413 |
| 76  | 1-SYBR | unmethylation | 54C | 0.57370 | 0.06919 | 0.06919 | 0.03995 | 0.03995 | 1.10652  | 0.56799 |
| 77  | 1-SYBR | unmethylation | 54N | 0.27850 | 0.06074 | 0.06074 | 0.03507 | 0.03507 | 0.27850  | 0.10589 |
| 78  | 1-SYBR | unmethylation | 57C | 0.12062 | 0.00107 | 0.00107 | 0.00062 | 0.00062 | 1.05380  | 0.27259 |
| 79  | 1-SYBR | unmethylation | 57N | 1.00000 | 0.07801 | 0.07801 | 0.04504 | 0.04504 | 2.86104  | 0.59325 |
| 80  | 1-SYBR | unmethylation | 59C | 0.67703 | 0.12116 | 0.12116 | 0.06995 | 0.06995 | 10.61133 | 1.89906 |
| 81  | 1-SYBR | unmethylation | 59N | 0.30339 | 0.03442 | 0.03442 | 0.01987 | 0.01987 | 5.95740  | 1.50161 |
| 82  | 1-SYBR | unmethylation | 62C | 0.39617 | 0.04660 | 0.04660 | 0.02690 | 0.02690 | 4.65725  | 1.70118 |
| 83  | 1-SYBR | unmethylation | 62N | 0.15787 | 0.02314 | 0.02314 | 0.01336 | 0.01336 | 2.38499  | 0.69950 |
| 84  | 1-SYBR | methylation   | 24A | 0.75846 | 0.24996 | 0.24996 | 0.17675 | 0.17675 | 5.61994  | 2.27228 |
| 85  | 1-SYBR | methylation   | 24C | 0.92490 | 0.31165 | 0.31165 | 0.17993 | 0.17993 | 2.16846  | 1.00621 |
| 86  | 1-SYBR | methylation   | 28A | 0.49535 | 0.23491 | 0.23491 | 0.13563 | 0.13563 | 0.49535  | 0.24034 |
| 87  | 1-SYBR | methylation   | 28C | 0.77130 | 0.14105 | 0.14105 | 0.09974 | 0.09974 | 21.01718 | 3.88409 |
| 88  | 1-SYBR | methylation   | 29A | 1.00000 | 0.02753 | 0.02753 | 0.01947 | 0.01947 | 27.88093 | 0.76764 |
| 89  | 1-SYBR | methylation   | 29C | 0.18433 | 0.01619 | 0.01619 | 0.01145 | 0.01145 | 4.28023  | 0.37589 |
| 90  | 1-SYBR | methylation   | 56C | 0.56722 | 0.26936 | 0.26936 | 0.15551 | 0.15551 | 1.10361  | 0.57009 |
| 91  | 1-SYBR | methylation   | 56N | 0.67925 | 0.23290 | 0.23290 | 0.16469 | 0.16469 | 19.01674 | 8.09211 |
| 92  | 1-SYBR | methylation   | 71C | 0.73162 | 0.00000 | 0.00000 | 0.00000 | 0.00000 | 6.47836  | 0.00000 |
| 93  | 1-SYBR | unmethylation | 24A | 0.27362 | 0.05224 | 0.05224 | 0.03016 | 0.03016 | 2.02742  | 0.61265 |
| 94  | 1-SYBR | unmethylation | 24C | 0.10019 | 0.03270 | 0.03270 | 0.01888 | 0.01888 | 0.23490  | 0.10721 |
| 95  | 1-SYBR | unmethylation | 28A | 1.00000 | 0.03039 | 0.03039 | 0.01754 | 0.01754 | 1.00000  | 0.10696 |
| 96  | 1-SYBR | unmethylation | 28C | 0.04037 | 0.00339 | 0.00339 | 0.00240 | 0.00240 | 1.10009  | 0.09687 |
| 97  | 1-SYBR | unmethylation | 29A | 0.04493 | 0.01348 | 0.01348 | 0.00778 | 0.00778 | 1.25283  | 0.37575 |
| 98  | 1-SYBR | unmethylation | 29C | 0.28107 | 0.02500 | 0.02500 | 0.01443 | 0.01443 | 6.52654  | 0.58041 |
| 99  | 1-SYBR | unmethylation | 56C | 0.19318 | 0.05800 | 0.05800 | 0.03349 | 0.03349 | 0.37585  | 0.13629 |
| 100 | 1-SYBR | unmethylation | 56N | 0.17173 | 0.01718 | 0.01718 | 0.01215 | 0.01215 | 4.80780  | 1.30352 |
| 101 | 1-SYBR | methylation   | 23A | 0.61628 | 0.02280 | 0.02280 | 0.01612 | 0.01612 | 9.27683  | 0.93270 |
| 102 | 1-SYBR | methylation   | 23C | 0.26298 | 0.00000 | 0.00000 | 0.00000 | 0.00000 | 3.47265  | 0.73998 |
| 103 | 1-SYBR | methylation   | 27C | 0.35139 | 0.00783 | 0.00783 | 0.00554 | 0.00554 | 0.84308  | 0.15617 |
| 104 | 1-SYBR | methylation   | 27N | 0.64756 | 0.10016 | 0.10016 | 0.05783 | 0.05783 | 0.64756  | 0.12791 |
| 105 | 1-SYBR | methylation   | 3A  | 0.31857 | 0.07964 | 0.07964 | 0.04598 | 0.04598 | 1.38403  | 0.34600 |
| 106 | 1-SYBR | methylation   | 3C  | 0.72749 | 0.10079 | 0.10079 | 0.07127 | 0.07127 | 2.26686  | 0.73649 |

| A   | B      | C             | D   | E       | F       | G       | H       | I       | J        | K        |
|-----|--------|---------------|-----|---------|---------|---------|---------|---------|----------|----------|
| 107 | 1-SYBR | methylation   | 50C | 0.41010 | 0.12210 | 0.12210 | 0.07050 | 0.07050 | 0.83715  | 0.24925  |
| 108 | 1-SYBR | methylation   | 50N | 0.79869 | 0.30935 | 0.30935 | 0.21874 | 0.21874 | 4.01033  | 1.60624  |
| 109 | 1-SYBR | methylation   | 68C | 0.28758 | 0.07749 | 0.07749 | 0.04474 | 0.04474 | 1.56308  | 0.42119  |
| 110 | 1-SYBR | methylation   | 68N | 0.27752 | 0.05272 | 0.05272 | 0.03728 | 0.03728 | 0.33340  | 0.06849  |
| 111 | 1-SYBR | methylation   | 71C | 1.00000 | 0.34785 | 0.34785 | 0.24597 | 0.24597 | 14.18405 | 4.93392  |
| 112 | 1-SYBR | unmethylation | 23A | 0.04626 | 0.00574 | 0.00574 | 0.00331 | 0.00331 | 0.69641  | 0.10819  |
| 113 | 1-SYBR | unmethylation | 23C | 0.46014 | 0.04229 | 0.04229 | 0.02442 | 0.02442 | 6.07618  | 1.41006  |
| 114 | 1-SYBR | unmethylation | 27C | 0.21881 | 0.04607 | 0.04607 | 0.02660 | 0.02660 | 0.52499  | 0.14676  |
| 115 | 1-SYBR | unmethylation | 27N | 0.36368 | 0.01908 | 0.01908 | 0.01101 | 0.01101 | 0.36368  | 0.04858  |
| 116 | 1-SYBR | unmethylation | 3A  | 0.68575 | 0.09646 | 0.09646 | 0.05569 | 0.05569 | 2.97926  | 0.41907  |
| 117 | 1-SYBR | unmethylation | 3C  | 0.55157 | 0.07284 | 0.07284 | 0.04206 | 0.04206 | 1.71869  | 0.55374  |
| 118 | 1-SYBR | unmethylation | 50C | 1.00000 | 0.07293 | 0.07293 | 0.04211 | 0.04211 | 2.04135  | 0.14889  |
| 119 | 1-SYBR | unmethylation | 50N | 0.72433 | 0.03744 | 0.03744 | 0.02161 | 0.02161 | 3.63694  | 0.41591  |
| 120 | 1-SYBR | unmethylation | 68C | 0.28128 | 0.00925 | 0.00925 | 0.00534 | 0.00534 | 1.52884  | 0.05038  |
| 121 | 1-SYBR | unmethylation | 68N | 0.76549 | 0.05931 | 0.05931 | 0.04194 | 0.04194 | 0.91962  | 0.10119  |
| 122 | 1-SYBR | methylation   | 36C | 0.44624 | 0.01948 | 0.01948 | 0.01378 | 0.01378 | 14.77090 | 2.61042  |
| 123 | 1-SYBR | methylation   | 36N | 0.58396 | 0.04010 | 0.04010 | 0.02835 | 0.02835 | 24.05095 | 3.27624  |
| 124 | 1-SYBR | methylation   | 44A | 1.00000 | 0.04181 | 0.04181 | 0.02956 | 0.02956 | 1.00000  | 0.21093  |
| 125 | 1-SYBR | methylation   | 44C | 0.32627 | 0.07401 | 0.07401 | 0.05233 | 0.05233 | 0.53400  | 0.12210  |
| 126 | 1-SYBR | methylation   | 51A | 0.96551 | 0.15197 | 0.15197 | 0.10746 | 0.10746 | 15.75660 | 3.06931  |
| 127 | 1-SYBR | methylation   | 51Q | 0.94099 | 0.26520 | 0.26520 | 0.18752 | 0.18752 | 7.13841  | 2.41441  |
| 128 | 1-SYBR | methylation   | 65C | 0.96689 | 0.29734 | 0.29734 | 0.21025 | 0.21025 | 21.05964 | 12.54260 |
| 129 | 1-SYBR | methylation   | 65N | 0.76589 | 0.00368 | 0.00368 | 0.00261 | 0.00261 | 19.31998 | 6.56982  |
| 130 | 1-SYBR | unmethylation | 36C | 1.00000 | 0.04842 | 0.04842 | 0.02796 | 0.02796 | 33.10066 | 5.89073  |
| 131 | 1-SYBR | unmethylation | 36N | 0.30393 | 0.03857 | 0.03857 | 0.02227 | 0.02227 | 12.51763 | 2.16628  |
| 132 | 1-SYBR | unmethylation | 44A | 0.26543 | 0.01493 | 0.01493 | 0.00862 | 0.00862 | 0.26543  | 0.05687  |
| 133 | 1-SYBR | unmethylation | 44C | 0.18374 | 0.01525 | 0.01525 | 0.00881 | 0.00881 | 0.30072  | 0.02641  |
| 134 | 1-SYBR | unmethylation | 51A | 0.19879 | 0.05011 | 0.05011 | 0.02893 | 0.02893 | 3.24409  | 0.89848  |
| 135 | 1-SYBR | unmethylation | 51Q | 0.51378 | 0.03222 | 0.03222 | 0.01860 | 0.01860 | 3.89754  | 0.76875  |
| 136 | 1-SYBR | unmethylation | 65C | 0.35190 | 0.01494 | 0.01494 | 0.01056 | 0.01056 | 7.66474  | 3.92281  |
| 137 | 1-SYBR | unmethylation | 65N | 0.10368 | 0.00888 | 0.00888 | 0.00512 | 0.00512 | 2.61550  | 0.91707  |



|    | L                                | M                       | N                                 | O          | P             | Q                       | R                | S                          | T     | U       | V       | W       |
|----|----------------------------------|-------------------------|-----------------------------------|------------|---------------|-------------------------|------------------|----------------------------|-------|---------|---------|---------|
| 1  |                                  |                         |                                   |            |               |                         |                  |                            |       |         |         |         |
| 2  | Corrected Unscaled Expression SD | Unscaled Expression SEM | Corrected Unscaled Expression SEM | Expression | Expression SD | Corrected Expression SD | Expression n SEM | Corrected Expression n SEM | Wells | Mean Cq | Cq SD   | Cq SEM  |
| 3  | 2.24876                          | 1.59011                 | 1.59011                           | 16.63273   | 2.24876       | 2.24876                 | 1.59011          | 1.59011                    | 2     | 36.23   | 0.19505 | 0.13792 |
| 4  | 0.00095                          | 0.00055                 | 0.00055                           | 0.00366    | 0.00095       | 0.00095                 | 0.00055          | 0.00055                    | 3     | 33.58   | 0.33565 | 0.19379 |
| 5  | 0.22276                          | 0.15752                 | 0.15752                           | 1.92858    | 0.22276       | 0.22276                 | 0.15752          | 0.15752                    | 2     | 34.02   | 0.02378 | 0.01682 |
| 6  | 0.33387                          | 0.19276                 | 0.19276                           | 1.00000    | 0.33387       | 0.33387                 | 0.19276          | 0.19276                    | 3     | 24.54   | 0.44799 | 0.25865 |
| 7  | 0.00211                          | 0.00122                 | 0.00122                           | 0.00263    | 0.00211       | 0.00211                 | 0.00122          | 0.00122                    | 3     | 33.54   | 0.78672 | 0.45421 |
| 8  | 0.00095                          | 0.00055                 | 0.00055                           | 0.00366    | 0.00095       | 0.00095                 | 0.00055          | 0.00055                    | 3     | 33.58   | 0.33565 | 0.19379 |
| 9  | 5.81640                          | 4.11282                 | 4.11282                           | 18.76637   | 5.81640       | 5.81640                 | 4.11282          | 4.11282                    | 2     | 35.71   | 0.44715 | 0.31618 |
| 10 | 0.00000                          | 0.00000                 | 0.00000                           | 0.32044    | 0.00000       | 0.00000                 | 0.00000          | 0.00000                    | 1     | 45.60   | 0.00000 | 0.00000 |
| 11 | 0.87671                          | 0.50617                 | 0.50617                           | 1.10673    | 0.87671       | 0.87671                 | 0.50617          | 0.50617                    | 3     | 25.53   | 0.15709 | 0.09070 |
| 12 | 0.00211                          | 0.00122                 | 0.00122                           | 0.00263    | 0.00211       | 0.00211                 | 0.00122          | 0.00122                    | 3     | 33.54   | 0.78672 | 0.45421 |
| 13 | 0.20564                          | 0.11872                 | 0.11872                           | 0.12595    | 0.20564       | 0.20564                 | 0.11872          | 0.11872                    | 3     | 40.07   | 2.35552 | 1.35996 |
| 14 | 0.00000                          | 0.00000                 | 0.00000                           | 0.32044    | 0.00000       | 0.00000                 | 0.00000          | 0.00000                    | 1     | 45.60   | 0.00000 | 0.00000 |
| 15 | 0.03178                          | 0.01835                 | 0.01835                           | 0.05854    | 0.03178       | 0.03178                 | 0.01835          | 0.01835                    | 3     | 38.12   | 0.76293 | 0.44048 |
| 16 | 0.29247                          | 0.16886                 | 0.16886                           | 0.26861    | 0.29247       | 0.29247                 | 0.16886          | 0.16886                    | 3     | 37.06   | 1.08910 | 0.62879 |
| 17 | 2.24876                          | 1.59011                 | 1.59011                           | 16.63273   | 2.24876       | 2.24876                 | 1.59011          | 1.59011                    | 2     | 36.23   | 0.19505 | 0.13792 |
| 18 | 0.16713                          | 0.09649                 | 0.09649                           | 0.15125    | 0.16713       | 0.16713                 | 0.09649          | 0.09649                    | 3     | 37.33   | 1.32617 | 0.76566 |
| 19 | 0.56982                          | 0.32898                 | 0.32898                           | 2.25608    | 0.56982       | 0.56982                 | 0.32898          | 0.32898                    | 3     | 26.42   | 0.36438 | 0.21037 |
| 20 | 0.39471                          | 0.22788                 | 0.22788                           | 0.26372    | 0.39471       | 0.39471                 | 0.22788          | 0.22788                    | 3     | 36.39   | 2.15925 | 1.24665 |
| 21 | 0.33387                          | 0.19276                 | 0.19276                           | 1.00000    | 0.33387       | 0.33387                 | 0.19276          | 0.19276                    | 3     | 24.54   | 0.44799 | 0.25865 |
| 22 | 0.87671                          | 0.50617                 | 0.50617                           | 1.10673    | 0.87671       | 0.87671                 | 0.50617          | 0.50617                    | 3     | 25.53   | 0.15709 | 0.09070 |
| 23 | 0.75643                          | 0.43672                 | 0.43672                           | 10.15168   | 0.75643       | 0.75643                 | 0.43672          | 0.43672                    | 3     | 27.46   | 0.10750 | 0.06206 |
| 24 | 0.60324                          | 0.34828                 | 0.34828                           | 0.86984    | 0.60324       | 0.60324                 | 0.34828          | 0.34828                    | 3     | 25.32   | 0.46743 | 0.26987 |
| 25 | 0.39486                          | 0.27921                 | 0.27921                           | 7.50335    | 0.39486       | 0.39486                 | 0.27921          | 0.27921                    | 2     | 34.31   | 0.07592 | 0.05368 |
| 26 | 1.67017                          | 1.18099                 | 1.18099                           | 6.95616    | 1.67017       | 1.67017                 | 1.18099          | 1.18099                    | 2     | 35.34   | 0.15602 | 0.11032 |
| 27 | 1.50565                          | 0.86928                 | 0.86928                           | 9.98282    | 1.50565       | 1.50565                 | 0.86928          | 0.86928                    | 3     | 34.21   | 0.14471 | 0.08355 |
| 28 | 2.02421                          | 1.43133                 | 1.43133                           | 5.11976    | 2.02421       | 2.02421                 | 1.43133          | 1.43133                    | 2     | 34.20   | 0.57040 | 0.40333 |
| 29 | 0.22023                          | 0.15572                 | 0.15572                           | 0.57670    | 0.22023       | 0.22023                 | 0.15572          | 0.15572                    | 2     | 38.31   | 0.44001 | 0.31113 |
| 30 | 3.12917                          | 3.12917                 | 3.12917                           | 10.91621   | 3.12917       | 3.12917                 | 3.12917          | 3.12917                    | 1     | 34.94   | 0.00000 | 0.00000 |
| 31 | 0.13554                          | 0.09584                 | 0.09584                           | 0.74579    | 0.13554       | 0.13554                 | 0.09584          | 0.09584                    | 2     | 34.11   | 0.05735 | 0.04055 |
| 32 | 1.47638                          | 1.04396                 | 1.04396                           | 4.85193    | 1.47638       | 1.47638                 | 1.04396          | 1.04396                    | 2     | 35.11   | 0.42566 | 0.30099 |
| 33 | 0.61945                          | 0.43802                 | 0.43802                           | 1.56886    | 0.61945       | 0.61945                 | 0.43802          | 0.43802                    | 2     | 39.03   | 0.56964 | 0.40279 |
| 34 | 0.34870                          | 0.20132                 | 0.20132                           | 1.56857    | 0.34870       | 0.34870                 | 0.20132          | 0.20132                    | 3     | 33.69   | 0.15335 | 0.08854 |
| 35 | 0.71723                          | 0.50716                 | 0.50716                           | 1.48191    | 0.71723       | 0.71723                 | 0.50716          | 0.50716                    | 2     | 35.39   | 0.09593 | 0.06783 |
| 36 | 0.41041                          | 0.23695                 | 0.23695                           | 5.20359    | 0.41041       | 0.41041                 | 0.23695          | 0.23695                    | 3     | 26.32   | 0.11379 | 0.06569 |
| 37 | 3.49833                          | 2.47369                 | 2.47369                           | 16.05092   | 3.49833       | 3.49833                 | 2.47369          | 2.47369                    | 2     | 25.61   | 0.05681 | 0.04017 |
| 38 | 1.09532                          | 0.77451                 | 0.77451                           | 5.89834    | 1.09532       | 1.09532                 | 0.77451          | 0.77451                    | 2     | 26.45   | 0.21300 | 0.15061 |
| 39 | 0.68733                          | 0.48602                 | 0.48602                           | 7.28475    | 0.68733       | 0.68733                 | 0.48602          | 0.48602                    | 2     | 25.17   | 0.13612 | 0.09625 |
| 40 | 1.40537                          | 0.81139                 | 0.81139                           | 5.52259    | 1.40537       | 1.40537                 | 0.81139          | 0.81139                    | 3     | 26.53   | 0.15772 | 0.09106 |
| 41 | 0.91311                          | 0.52718                 | 0.52718                           | 3.16258    | 0.91311       | 0.91311                 | 0.52718          | 0.52718                    | 3     | 28.21   | 0.04977 | 0.02874 |
| 42 | 0.04062                          | 0.02345                 | 0.02345                           | 0.22735    | 0.04062       | 0.04062                 | 0.02345          | 0.02345                    | 3     | 27.30   | 0.03141 | 0.01813 |
| 43 | 1.23866                          | 0.71514                 | 0.71514                           | 12.40111   | 1.23866       | 1.23866                 | 0.71514          | 0.71514                    | 3     | 25.23   | 0.09613 | 0.05550 |
| 44 | 0.30529                          | 0.17626                 | 0.17626                           | 1.50650    | 0.30529       | 0.30529                 | 0.17626          | 0.17626                    | 3     | 25.22   | 0.07832 | 0.04522 |
| 45 | 1.01127                          | 0.58386                 | 0.58386                           | 2.06969    | 1.01127       | 1.01127                 | 0.58386          | 0.58386                    | 3     | 26.39   | 0.13621 | 0.07864 |
| 46 | 1.24754                          | 0.88214                 | 0.88214                           | 4.05795    | 1.24754       | 1.24754                 | 0.88214          | 0.88214                    | 2     | 33.70   | 0.44353 | 0.31362 |
| 47 | 0.48569                          | 0.34343                 | 0.34343                           | 0.80117    | 0.48569       | 0.48569                 | 0.34343          | 0.34343                    | 2     | 34.00   | 0.00710 | 0.00502 |
| 48 | 0.14030                          | 0.09921                 | 0.09921                           | 4.60939    | 0.14030       | 0.14030                 | 0.09921          | 0.09921                    | 2     | 33.57   | 0.04391 | 0.03105 |
| 49 | 0.28553                          | 0.16485                 | 0.16485                           | 1.08001    | 0.28553       | 0.28553                 | 0.16485          | 0.16485                    | 3     | 33.78   | 0.28342 | 0.16363 |
| 50 | 0.00000                          | 0.00000                 | 0.00000                           | 2.15548    | 0.00000       | 0.00000                 | 0.00000          | 0.00000                    | 1     | 33.46   | 0.00000 | 0.00000 |
| 51 | 0.54842                          | 0.54842                 | 0.54842                           | 1.28139    | 0.54842       | 0.54842                 | 0.54842          | 0.54842                    | 1     | 35.24   | 0.00000 | 0.00000 |
| 52 | 0.68760                          | 0.39699                 | 0.39699                           | 0.90556    | 0.68760       | 0.68760                 | 0.39699          | 0.39699                    | 3     | 33.60   | 0.73196 | 0.42260 |

|     | L       | M       | N       | O        | P       | Q       | R       | S       | T | U     | V       | W       |
|-----|---------|---------|---------|----------|---------|---------|---------|---------|---|-------|---------|---------|
| 53  | 1.88088 | 1.32998 | 1.32998 | 19.83919 | 1.88088 | 1.88088 | 1.32998 | 1.32998 | 2 | 35.33 | 0.13678 | 0.09672 |
| 54  | 0.29871 | 0.17246 | 0.17246 | 3.26932  | 0.29871 | 0.29871 | 0.17246 | 0.17246 | 3 | 33.84 | 0.13182 | 0.07610 |
| 55  | 0.00209 | 0.00121 | 0.00121 | 0.04916  | 0.00209 | 0.00209 | 0.00121 | 0.00121 | 3 | 31.11 | 0.06130 | 0.03539 |
| 56  | 0.00222 | 0.00128 | 0.00128 | 0.00061  | 0.00222 | 0.00222 | 0.00128 | 0.00128 | 3 | 35.41 | 5.16450 | 2.98172 |
| 57  | 0.23912 | 0.13805 | 0.13805 | 1.70571  | 0.23912 | 0.23912 | 0.13805 | 0.13805 | 3 | 26.05 | 0.20225 | 0.11677 |
| 58  | 0.14233 | 0.08217 | 0.08217 | 0.66266  | 0.14233 | 0.14233 | 0.08217 | 0.08217 | 3 | 25.53 | 0.17569 | 0.10143 |
| 59  | 0.00992 | 0.00573 | 0.00573 | 0.02137  | 0.00992 | 0.00992 | 0.00573 | 0.00573 | 3 | 32.19 | 0.25892 | 0.14949 |
| 60  | 0.56970 | 0.32892 | 0.32892 | 1.00000  | 0.56970 | 0.56970 | 0.32892 | 0.32892 | 3 | 24.51 | 0.10613 | 0.06127 |
| 61  | 0.09040 | 0.05219 | 0.05219 | 0.39606  | 0.09040 | 0.09040 | 0.05219 | 0.05219 | 3 | 32.03 | 0.32930 | 0.19012 |
| 62  | 0.01412 | 0.00815 | 0.00815 | 0.02430  | 0.01412 | 0.01412 | 0.00815 | 0.00815 | 3 | 31.96 | 0.83817 | 0.48392 |
| 63  | 0.70558 | 0.40737 | 0.40737 | 4.29496  | 0.70558 | 0.70558 | 0.40737 | 0.40737 | 3 | 32.92 | 0.21617 | 0.12481 |
| 64  | 0.44262 | 0.31298 | 0.31298 | 7.13873  | 0.44262 | 0.44262 | 0.31298 | 0.31298 | 2 | 32.03 | 0.08945 | 0.06325 |
| 65  | 0.75513 | 0.43597 | 0.43597 | 1.39823  | 0.75513 | 0.75513 | 0.43597 | 0.43597 | 3 | 31.79 | 0.29821 | 0.17217 |
| 66  | 0.28684 | 0.16561 | 0.16561 | 0.66909  | 0.28684 | 0.28684 | 0.16561 | 0.16561 | 3 | 31.91 | 0.42502 | 0.24538 |
| 67  | 2.54497 | 1.46934 | 1.46934 | 6.60664  | 2.54497 | 2.54497 | 1.46934 | 1.46934 | 3 | 31.73 | 0.41201 | 0.23787 |
| 68  | 0.62412 | 0.36034 | 0.36034 | 1.17717  | 0.62412 | 0.62412 | 0.36034 | 0.36034 | 3 | 32.61 | 0.71292 | 0.41160 |
| 69  | 1.42574 | 0.82315 | 0.82315 | 7.45356  | 1.42574 | 1.42574 | 0.82315 | 0.82315 | 3 | 32.40 | 0.27596 | 0.15933 |
| 70  | 1.30451 | 0.92243 | 0.92243 | 5.74414  | 1.30451 | 1.30451 | 0.92243 | 0.92243 | 2 | 33.10 | 0.04360 | 0.03083 |
| 71  | 0.67898 | 0.39201 | 0.39201 | 1.11506  | 0.67898 | 0.67898 | 0.39201 | 0.39201 | 3 | 34.72 | 0.72305 | 0.41745 |
| 72  | 0.23570 | 0.16667 | 0.16667 | 0.91784  | 0.23570 | 0.23570 | 0.16667 | 0.16667 | 2 | 35.37 | 0.05429 | 0.03839 |
| 73  | 0.00000 | 0.00000 | 0.00000 | 6.34316  | 0.00000 | 0.00000 | 0.00000 | 0.00000 | 1 | 31.33 | 0.00000 | 0.00000 |
| 74  | 0.03024 | 0.01746 | 0.01746 | 0.18201  | 0.03024 | 0.03024 | 0.01746 | 0.01746 | 3 | 30.51 | 0.21908 | 0.12648 |
| 75  | 0.03413 | 0.01970 | 0.01970 | 0.12174  | 0.03413 | 0.03413 | 0.01970 | 0.01970 | 3 | 30.92 | 0.40439 | 0.23348 |
| 76  | 0.56799 | 0.32793 | 0.32793 | 1.10652  | 0.56799 | 0.56799 | 0.32793 | 0.32793 | 3 | 25.15 | 0.17400 | 0.10046 |
| 77  | 0.10589 | 0.06114 | 0.06114 | 0.27850  | 0.10589 | 0.10589 | 0.06114 | 0.06114 | 3 | 26.19 | 0.31467 | 0.18168 |
| 78  | 0.27259 | 0.15738 | 0.15738 | 1.05380  | 0.27259 | 0.27259 | 0.15738 | 0.15738 | 3 | 27.40 | 0.01277 | 0.00737 |
| 79  | 0.59325 | 0.34251 | 0.34251 | 2.86104  | 0.59325 | 0.59325 | 0.34251 | 0.34251 | 3 | 24.35 | 0.11255 | 0.06498 |
| 80  | 1.89906 | 1.09642 | 1.09642 | 10.61133 | 1.89906 | 1.89906 | 1.09642 | 1.09642 | 3 | 24.91 | 0.25819 | 0.14907 |
| 81  | 1.50161 | 0.86696 | 0.86696 | 5.95740  | 1.50161 | 1.50161 | 0.86696 | 0.86696 | 3 | 26.07 | 0.16367 | 0.09450 |
| 82  | 1.70118 | 0.98218 | 0.98218 | 4.65725  | 1.70118 | 1.70118 | 0.98218 | 0.98218 | 3 | 25.68 | 0.16970 | 0.09798 |
| 83  | 0.69950 | 0.40385 | 0.40385 | 2.38499  | 0.69950 | 0.69950 | 0.40385 | 0.40385 | 3 | 27.01 | 0.21148 | 0.12210 |
| 84  | 2.27228 | 1.60675 | 1.60675 | 5.61994  | 2.27228 | 2.27228 | 1.60675 | 1.60675 | 2 | 32.29 | 0.47546 | 0.33620 |
| 85  | 1.00621 | 0.58093 | 0.58093 | 2.16846  | 1.00621 | 1.00621 | 0.58093 | 0.58093 | 3 | 32.00 | 0.48612 | 0.28066 |
| 86  | 0.24034 | 0.13876 | 0.13876 | 0.49535  | 0.24034 | 0.24034 | 0.13876 | 0.13876 | 3 | 32.91 | 0.68418 | 0.39501 |
| 87  | 3.88409 | 2.74647 | 2.74647 | 21.01718 | 3.88409 | 3.88409 | 2.74647 | 2.74647 | 2 | 32.27 | 0.26384 | 0.18656 |
| 88  | 0.76764 | 0.54280 | 0.54280 | 27.88093 | 0.76764 | 0.76764 | 0.54280 | 0.54280 | 2 | 31.89 | 0.03972 | 0.02809 |
| 89  | 0.37589 | 0.26580 | 0.26580 | 4.28023  | 0.37589 | 0.37589 | 0.26580 | 0.26580 | 2 | 34.33 | 0.12670 | 0.08959 |
| 90  | 0.57009 | 0.32914 | 0.32914 | 1.10361  | 0.57009 | 0.57009 | 0.32914 | 0.32914 | 3 | 32.71 | 0.68510 | 0.39554 |
| 91  | 8.09211 | 5.72198 | 5.72198 | 19.01674 | 8.09211 | 8.09211 | 5.72198 | 5.72198 | 2 | 32.45 | 0.49467 | 0.34979 |
| 92  | 0.00000 | 0.00000 | 0.00000 | 6.47836  | 0.00000 | 0.00000 | 0.00000 | 0.00000 | 1 | 32.34 | 0.00000 | 0.00000 |
| 93  | 0.61265 | 0.35371 | 0.35371 | 2.02742  | 0.61265 | 0.61265 | 0.35371 | 0.35371 | 3 | 25.39 | 0.27543 | 0.15902 |
| 94  | 0.10721 | 0.06190 | 0.06190 | 0.23490  | 0.10721 | 0.10721 | 0.06190 | 0.06190 | 3 | 26.84 | 0.47085 | 0.27185 |
| 95  | 0.10696 | 0.06175 | 0.06175 | 1.00000  | 0.10696 | 0.10696 | 0.06175 | 0.06175 | 3 | 23.52 | 0.04384 | 0.02531 |
| 96  | 0.09687 | 0.06850 | 0.06850 | 1.10009  | 0.09687 | 0.09687 | 0.06850 | 0.06850 | 2 | 28.15 | 0.12109 | 0.08562 |
| 97  | 0.37575 | 0.21694 | 0.21694 | 1.25283  | 0.37575 | 0.37575 | 0.21694 | 0.21694 | 3 | 27.99 | 0.43270 | 0.24982 |
| 98  | 0.58041 | 0.33510 | 0.33510 | 6.52654  | 0.58041 | 0.58041 | 0.33510 | 0.33510 | 3 | 25.35 | 0.12830 | 0.07407 |
| 99  | 0.13629 | 0.07868 | 0.07868 | 0.37585  | 0.13629 | 0.13629 | 0.07868 | 0.07868 | 3 | 25.89 | 0.43317 | 0.25009 |
| 100 | 1.30352 | 0.92172 | 0.92172 | 4.80780  | 1.30352 | 1.30352 | 0.92172 | 0.92172 | 2 | 26.06 | 0.14430 | 0.10204 |
| 101 | 0.93270 | 0.65952 | 0.65952 | 9.27683  | 0.93270 | 0.93270 | 0.65952 | 0.65952 | 2 | 34.48 | 0.05337 | 0.03774 |
| 102 | 0.73998 | 0.73998 | 0.73998 | 3.47265  | 0.73998 | 0.73998 | 0.73998 | 0.73998 | 1 | 35.71 | 0.00000 | 0.00000 |
| 103 | 0.15617 | 0.11043 | 0.11043 | 0.84308  | 0.15617 | 0.15617 | 0.11043 | 0.11043 | 2 | 35.29 | 0.03214 | 0.02273 |
| 104 | 0.12791 | 0.07385 | 0.07385 | 0.64756  | 0.12791 | 0.12791 | 0.07385 | 0.07385 | 3 | 34.41 | 0.22315 | 0.12883 |
| 105 | 0.34600 | 0.19977 | 0.19977 | 1.38403  | 0.34600 | 0.34600 | 0.19977 | 0.19977 | 3 | 35.43 | 0.36067 | 0.20823 |
| 106 | 0.73649 | 0.52078 | 0.52078 | 2.26686  | 0.73649 | 0.73649 | 0.52078 | 0.52078 | 2 | 34.24 | 0.19988 | 0.14134 |

|     | L        | M       | N       | O        | P        | Q        | R       | S       | T | U     | V       | W       |
|-----|----------|---------|---------|----------|----------|----------|---------|---------|---|-------|---------|---------|
| 107 | 0.24925  | 0.14391 | 0.14391 | 0.83715  | 0.24925  | 0.24925  | 0.14391 | 0.14391 | 3 | 35.07 | 0.42955 | 0.24800 |
| 108 | 1.60624  | 1.13579 | 1.13579 | 4.01033  | 1.60624  | 1.60624  | 1.13579 | 1.13579 | 2 | 34.11 | 0.55878 | 0.39512 |
| 109 | 0.42119  | 0.24318 | 0.24318 | 1.56308  | 0.42119  | 0.42119  | 0.24318 | 0.24318 | 3 | 35.58 | 0.38874 | 0.22444 |
| 110 | 0.06849  | 0.04843 | 0.04843 | 0.33340  | 0.06849  | 0.06849  | 0.04843 | 0.04843 | 2 | 35.63 | 0.27409 | 0.19381 |
| 111 | 4.93392  | 3.48881 | 3.48881 | 14.18405 | 4.93392  | 4.93392  | 3.48881 | 3.48881 | 2 | 33.78 | 0.50184 | 0.35486 |
| 112 | 0.10819  | 0.06246 | 0.06246 | 0.69641  | 0.10819  | 0.10819  | 0.06246 | 0.06246 | 3 | 28.91 | 0.17900 | 0.10334 |
| 113 | 1.41006  | 0.81410 | 0.81410 | 6.07618  | 1.41006  | 1.41006  | 0.81410 | 0.81410 | 3 | 25.60 | 0.13259 | 0.07655 |
| 114 | 0.14676  | 0.08473 | 0.08473 | 0.52499  | 0.14676  | 0.14676  | 0.08473 | 0.08473 | 3 | 26.67 | 0.30377 | 0.17538 |
| 115 | 0.04858  | 0.02805 | 0.02805 | 0.36368  | 0.04858  | 0.04858  | 0.02805 | 0.02805 | 3 | 25.94 | 0.07568 | 0.04369 |
| 116 | 0.41907  | 0.24195 | 0.24195 | 2.97926  | 0.41907  | 0.41907  | 0.24195 | 0.24195 | 3 | 25.02 | 0.20293 | 0.11716 |
| 117 | 0.55374  | 0.31970 | 0.31970 | 1.71869  | 0.55374  | 0.55374  | 0.31970 | 0.31970 | 3 | 25.34 | 0.19053 | 0.11000 |
| 118 | 0.14889  | 0.08596 | 0.08596 | 2.04135  | 0.14889  | 0.14889  | 0.08596 | 0.08596 | 3 | 24.48 | 0.10522 | 0.06075 |
| 119 | 0.41591  | 0.24013 | 0.24013 | 3.63694  | 0.41591  | 0.41591  | 0.24013 | 0.24013 | 3 | 24.94 | 0.07456 | 0.04305 |
| 120 | 0.05038  | 0.02909 | 0.02909 | 1.52884  | 0.05038  | 0.05038  | 0.02909 | 0.02909 | 3 | 26.31 | 0.04746 | 0.02740 |
| 121 | 0.10119  | 0.07155 | 0.07155 | 0.91962  | 0.10119  | 0.10119  | 0.07155 | 0.07155 | 2 | 24.86 | 0.11179 | 0.07905 |
| 122 | 2.61042  | 1.84585 | 1.84585 | 14.77090 | 2.61042  | 2.61042  | 1.84585 | 1.84585 | 2 | 36.32 | 0.06298 | 0.04454 |
| 123 | 3.27624  | 2.31665 | 2.31665 | 24.05095 | 3.27624  | 3.27624  | 2.31665 | 2.31665 | 2 | 35.93 | 0.09906 | 0.07005 |
| 124 | 0.21093  | 0.14915 | 0.14915 | 1.00000  | 0.21093  | 0.21093  | 0.14915 | 0.14915 | 2 | 35.16 | 0.06031 | 0.04265 |
| 125 | 0.12210  | 0.08634 | 0.08634 | 0.53400  | 0.12210  | 0.12210  | 0.08634 | 0.08634 | 2 | 36.77 | 0.32727 | 0.23141 |
| 126 | 3.06931  | 2.17033 | 2.17033 | 15.75660 | 3.06931  | 3.06931  | 2.17033 | 2.17033 | 2 | 35.21 | 0.22708 | 0.16057 |
| 127 | 2.41441  | 1.70725 | 1.70725 | 7.13841  | 2.41441  | 2.41441  | 1.70725 | 1.70725 | 2 | 35.24 | 0.40659 | 0.28750 |
| 128 | 12.54260 | 8.86896 | 8.86896 | 21.05964 | 12.54260 | 12.54260 | 8.86896 | 8.86896 | 2 | 35.20 | 0.44367 | 0.31372 |
| 129 | 6.56982  | 4.64556 | 4.64556 | 19.31998 | 6.56982  | 6.56982  | 4.64556 | 4.64556 | 2 | 35.54 | 0.00694 | 0.00491 |
| 130 | 5.89073  | 3.40102 | 3.40102 | 33.10066 | 5.89073  | 5.89073  | 3.40102 | 3.40102 | 3 | 24.25 | 0.06986 | 0.04033 |
| 131 | 2.16628  | 1.25070 | 1.25070 | 12.51763 | 2.16628  | 2.16628  | 1.25070 | 1.25070 | 3 | 25.96 | 0.18310 | 0.10571 |
| 132 | 0.05687  | 0.03283 | 0.03283 | 0.26543  | 0.05687  | 0.05687  | 0.03283 | 0.03283 | 3 | 26.16 | 0.08116 | 0.04686 |
| 133 | 0.02641  | 0.01525 | 0.01525 | 0.30072  | 0.02641  | 0.02641  | 0.01525 | 0.01525 | 3 | 26.69 | 0.11977 | 0.06915 |
| 134 | 0.89848  | 0.51874 | 0.51874 | 3.24409  | 0.89848  | 0.89848  | 0.51874 | 0.51874 | 3 | 26.58 | 0.36365 | 0.20995 |
| 135 | 0.76875  | 0.44384 | 0.44384 | 3.89754  | 0.76875  | 0.76875  | 0.44384 | 0.44384 | 3 | 25.21 | 0.09046 | 0.05223 |
| 136 | 3.92281  | 2.77385 | 2.77385 | 7.66474  | 3.92281  | 3.92281  | 2.77385 | 2.77385 | 2 | 25.75 | 0.06124 | 0.04330 |
| 137 | 0.91707  | 0.52947 | 0.52947 | 2.61550  | 0.91707  | 0.91707  | 0.52947 | 0.52947 | 3 | 27.52 | 0.12350 | 0.07130 |
